# Supplementary material for: Two-dimensional Numerical Simulations of Mixing under Ice Keels
Source: Copernicus journal article supplement (doi:10.5194/egusphere-2023-1756), 2023-09-14
Supplement: Supplementary file [file egusphere-2023-1756-AC1-supplement.pdf]

# Two-Dimensional Numerical Simulations of Mixing under Ice Keels

## Response to Reviewer #1

We would like to thank the reviewer for their thoughtful and detailed evaluation of our manuscript. We believe the manuscript has benefited greatly from your suggestions. Below, each question/suggestion from the review is listed followed by our response to it in blue. In suggestions where content was added or modified to the manuscript, the content is listed below the response *italicized*.

### Reviewer comments:

As a reader and editor for Ocean Science, I found the topic and content of this submission to be more suitable for Ocean Science. If you agree, the submission could be transferred from TC to Ocean Science and retain the reviews and discussion.

- We thank the reviewer for this suggestion. After careful consideration, we still believe that TC is a better fit overall. While the mixing aspect may be more suited towards OS, our original goal was to make the paper and its analysis accessible to TC in hopes of extending this topic further observationally.

Li 146: definition of the buoyancy difference,  $\Delta B$ . There is some inconsistency with using the summer and winter  $\Delta S$  bounds and the mixed layer depth from Peralta-Ferriz and Woodgate. They used a density step threshold of  $0.1 \text{ kg/m}^3$  which roughly translates to a buoyancy difference of  $1e-3 \text{ m/s}^2$ . But your range is from about three times to 75 times that value. I certainly do not ask for new simulations. However, you should discuss the implications of this.

- Thank you for pointing this out; we have clarified this potential source of confusion in several ways:
  - We clarify that our approach is consistent with the 2-layer model presented in PFW (see their Figure 9c).
  - We note that the threshold of  $0.1 \text{ kg/m}^3$  is used to estimate mixed-layer depths over a variety of seasons and regions. This value provides an estimate of the minimum density change necessary to indicate the base of the mixed layer. Given that the largest surface stratification occurs in summer, we expect our value to indeed be larger than this threshold. That being said, a two-layer model will, by construction, tend to yield a larger than observed stratification (though PFW note finding many “step-like” summer profiles). We clarify this in our methods, where we compute the buoyancy difference ( $\Delta B$ ):
    - *Note that this will yield larger  $\Delta B$ -values than those resulting from using the  $0.1 \text{ kg/m}^3$  density step from PFW, from which we obtained our mixed-layer depth. The discrepancy in  $\Delta B$  results from our*

*choice to define the densities  $\rho_1$  and  $\rho_2$  using summer and winter values, where -- by contrast -- PFW defines  $\rho_2$  using a value representing the transition between the summer and winter layers. We believe that the former better encapsulates summer conditions reminiscent of PFW's two-layer model (see their Figure 9c).*

- We now note that this could impact our results by inhibiting the impact of mixing due to a stronger stratification in our Limitations section:
  - *First, we choose large values of viscosity and diffusivity to ensure numerical stability, but these choices have further consequences in addition to a strong stratification from our two-layer model. Mainly, they reduce the buoyancy Reynolds number  $Re_b$ , which can be thought of...*

Referring to Figure 8, if the vertical reach of mixing is roughly two times  $z_0$ , i.e., one additional mixed layer depth below the mixed layer depth of  $z_0$ , for a relatively thick pycnocline layer (in real ocean) below a shallow mixed layer (say,  $z_0=10$  m and the diffuse pycnocline thickness is 20 m), mixing will not penetrate below the pycnocline and will not contribute to entrainment into the mixed layer. I would like to see some discussion about this.

- Thank you for pointing this out. Our pycnocline is approximately  $0.5z_0$  after settling, which is on the thinner side for seasonal pycnoclines. Indeed, regimes that have large mixing rates due to entrainment of the deeper ocean (e.g., Vortex Shedding regime) would likely see reduced mixing rates for a thicker pycnocline because, as you mention, they would entrain less deep water into the mixed layer. We have added a comment that brings this to the reader's attention. Note that a thicker pycnocline might make it easier to entrain partially-mixed water (with density between the summer and winter layer densities) due to a weaker buoyancy frequency, but it is uncertain how much this would compensate for the decrease in mixing rates mentioned above. We have added a couple sentences summarizing this at the end of our results:
  - *In addition, our pycnocline is on the thinner side ( $\sim 0.5z_0$  after settling) in comparison to other seasonal pycnocline measurements (thickness values beyond  $z_0$  are possible, as seen in PFW). Simulations with large mixing rates due to entrainment of the deeper ocean ( $\mathcal{Z}U$  or  $\mathcal{Z}D \geq 1$ , as in the Vortex Shedding regime) would likely see reduced rates for a thicker pycnocline.*

Discussion includes "Implications" (actually, climatological and trend estimates), and "Limitations". I would like to see some discussion of the results too, on the findings in general but also including perhaps a discussion on the context/applicability of other studies on flow over sills etc, on the excluded interfacial/internal wave drag and related processes.

- We appreciate this suggestion but were also concerned that adding additional sections would seem repetitive. After careful consideration, we ultimately chose not to include more discussion of the results or the similarity of our work to studies of flow over sills beyond what was presented in Section 4 and Section 1, respectively.

Opening paragraph: the narrative suggests the issue is a misrepresentation of ocean mixing under ice-covered waters. But this is only part of the story of the poor performance of large-scale models.

- We agree and thank the reviewer for this suggestion. We have addressed this point by “softening” the language through the first paragraph to more accurately reflect \*possible\* implications of improving our understanding of ice-ocean interactions, as follows:
  - ... *potentially contributing to an unrealistic representation of the Arctic halocline...*
  - *This may have direct implications for biases in simulated circulations of Pacific and Atlantic Water and possibly sea ice retreat...*

Second paragraph: studies diverge on the effect of decreased sea ice cover on potentially increasing wind-induced mixing. The literature review on this is not up-to-date. There are several studies that attempted to quantify the change in the near-inertial energy field in the Arctic in recent decades and how this is influenced by the sea ice cover.

- We thank the reviewer for this suggestion, which we have addressed by altering our second paragraph to emphasize that this is still an open area of research, and have included more up-to-date publications:
  - *The shrinkage of this “sea ice lid” has allowed the wind to interact directly with the ocean, increasing wind-driven momentum transfer into the ocean but yielding uncertain effects for vertical mixing (Guthrie et al., 2020; Lincoln et al., 2016; Dosser et al., 2021; Fine & Cole, 2022).*

Third paragraph: I am not a sea-ice expert, but I suspect the cited literature on changes in sea ice thickness and age may be outdated (newest 2018). Given that this is a submission to TC, the state-of-the-art can be improved.

- We have added three papers (Sumata et al., 2023; Zhang et al., 2021; Meier & Stroeve, 2022) published in the last three years to our cited literature in paragraph three. These studies come to similar conclusions as were reached in the older literature, but on a larger and more recent data set. Thank you for pointing this out.

Li 46-48: Agreed, but please also include some seminal papers from McPhee on the effects of under-ice roughness. (Actually, the only McPhee reference cited is from 1976.)

- Thank you for noting our lack of reference to McPhee’s work in ice ocean boundary layers. We have reviewed McPhee’s publications and updated this section to reference three additional, relevant papers, concerning vertical mixing (McPhee, 1983), internal wave generation (McPhee & Kantha, 1989), and ice-ocean drag (McPhee, 2012).

Li 51-52: Although not directly an ice-keel study, laboratory experiments in cases where the ice floe protrudes into the pycnocline reported in Carr et al (2019) can also be insightful. [Carr, M., et al. (2019). Laboratory experiments on internal solitary waves in ice-covered waters. *Geophysical Research Letters*, 46, <https://doi.org/10.1029/2019GL084710>]

- Thank you for bringing this paper to our attention. We have added this study to our literature review on mixing underneath ice floes in the introduction (fifth paragraph):
  - *Carr et al. (2019) and Zhang et al. (2022) ran numerical experiments of internal solitary waves (non-linear, non-hydrostatic oscillations of the pycnocline) impinging on floe edges and ice keels, respectively, reporting that this interaction can result in the creation of secondary waves and turbulence.*

Li 67: one of three and one of four stirring regimes can be confusing for the reader. Perhaps simply “we categorize the different stirring regimes in the upstream and downstream of the keel for each simulation.”

- We agree and have implemented the suggested change.

Li 84: I generally agree to ignore Coriolis in this study, but note that you do not need to go far from the boundary layer before the effect of rotation has a significant influence on the mixing length (so-called outer layer, see the McPhee book or book chapters).

- Thank you for bringing this to our attention. Using a bulk stress estimate for the friction velocity ( $u_*$ ) for a variety of our keel speeds and McPhee’s formulation for the surface layer extent ( $z_{sl}=0.05*u_*/f$ ), we find that the surface layer can extend from a couple meters to 18m in our simulations (for a conservative drag coefficient of  $5.5*10^{-3}$  considering a keel is present); we note that the large surface-layer extent is a byproduct of our large keel speeds. The majority of the mixing we observe occurs within this surface layer, where rotation does not influence the mixing length. Additionally, we believe rotational effects would not be observed in the outer layer if we modified our model to account for rotation, as our simulation timescales are prohibitively short (shorter than an inertial period). We have added a few sentences elaborating on this in our Methods section, where we remark that we neglect Coriolis terms:
  - *Note that one does not need to go far from the ice boundary (a couple meters for typical surface stresses) before rotation can influence the mixing length (McPhee, 2012); however, our timescales are sufficiently short (shorter than an inertial period) to neglect rotational effects.*

Fig 1 caption can also define  $\phi$ ,  $\sigma$  and  $h$  or refer to text. Throughout, please use Roman Fr for the Froude number and Re for the Reynolds number.

- We thank the reviewer for these suggestions and we’ve implemented the suggested changes both in the Figure 1 caption and throughout the text.

Li 169: I’m not sure how to interpret this Re when the viscosity is replaced with a large value that mimics turbulent viscosity. I guess it is common practice in modeling. One of its implications, in mixing through low buoyancy Re is discussed later. Perhaps here a comment is also needed, about this implication and others if any, for the non-modeler reader.

- Yes, it is common practice in the modeling community and borne out of necessity, because numerical grids can accommodate fine velocity gradients only up to a point. We thank you for reminding us that readers of The Cryosphere may not be familiar

with this concept, and have added a sentence to clarify where we introduce our diffusivities:

- *We choose such large values for  $\nu$  and  $\mu$  to dissipate eddies smaller than the resolution of the grid, similar to the choice of Zhang et al. (2022), which keeps our numerical cost tractable. These values may have quantitative consequences on mixing but should preserve our qualitative conclusions, as we discuss in Section 5.2.*

Eq.10: Why is the sorted density not a function of the horizontal distance,  $x$ ?

- The sorted density field, or the background density field, cannot vary in the  $x$  direction. If it did, then it would necessarily contain available potential energy. That is, if there were horizontal gradients in the sorted density profile, it would no longer be describing the minimum potential energy state because globally over the entire domain, the lighter parcels will rise and denser parcels will sink due to the gravitational force. By definition, however, the background density field corresponds to a state of minimum potential energy of the system, and requires an arbitrary fluid parcel to be located at a strictly lesser depth than every denser parcel. This background density field is a purely mathematical construct and provides a useful reference point against which to measure the location of the global center of fluid mass. For the fluid system as a whole, irreversible mixing changes this global center of mass (by converting available potential energy into background potential energy). In simulations, because we have a limited domain and because we know the density distribution throughout the domain at every time step, we can compute this change in the global center of mass at every time step by finding the minimum potential energy state of the system at that time. This is different from common methods of estimating irreversible mixing in observational work that typically use localized vertical temperature gradients (e.g., Osborne-Cox models). Instead, as described in the manuscript, the method we use here follows Winters et al (1995) to decompose potential energy into the background and available components to diagnose mixing. We appreciate the reviewer's comment, but after careful consideration, we decided that an in-depth explanation of the energy decomposition beyond what is already included in the paper and references to Winters et al (1995) would distract from the main narrative of the study.

Li220: because of the division by [the molecular diffusivity]  $\mu$ , ... (to help the reader)

- We agree with your suggestion and have implemented this change.

Li 257: cross-reference should be to section 2.1

- Yes, thank you; we have implemented this change.

Li 271: please clarify "ahead" of the keel, by using upstream or downstream

- Thank you for this comment. We have replaced it with "upstream".

Fig 5 caption: the regime was defined without "Waves" in it [Unstable Subcritical regime]

- Thank you for catching this error.

Li 272: Fig3b shows the streamline not the vorticity. Perhaps use : “as we can see in the streamlines in Fig 3b... and in the spanwise vorticity field in Fig 5a.

- We agree and have reworded this line:
  - *...as evidenced by the streamlines in Figure 3b and by the spanwise vorticity field in Figure 5b, in the region  $40 < x/z_0 < 70$ .*

Li 295: please comment on the presence or lack of mixing for this regime

- We intended this section to be a kinematic description of the regimes, with discussions of mixing reserved for Section 4. In Section 4 (Li 374), we briefly discuss the lack of mixing in the Fast-Laminar regime due to its predominantly flat isopycnals and very infrequent vortex advection. We believe that this sufficiently explains our reported mixing values.

Table 2 Caption: Missing “mixing” before depths. A missing closing bracket in the end.

- Thank you for catching this error; we have revised the caption.

Li 323: could insert: “... the largest mixing rate [in the upstream] does not ...”

- We agree and have reworded this line.

Fig 8 caption: could also mention  $\overline{Z} = 1$  equals the mixed layer depth,  $z_0$ .

- We agree and have implemented this change:
  - *As a reminder,  $\overline{Z}_{\Omega} = 1$  implies a mixing depth equal to the mixed-layer depth.*

Li 409: using a constant speed is an over simplification that is worth commenting

- Thank you for bringing this up, especially since this oversimplification may be the biggest in Section 5.1. We have added a comment noting that this is a simplification when we introduce the climatological pan-Arctic ice speed  $U$ :
  - *This is a vast simplification, as in reality  $U$  varies largely across the Arctic due to spatial and temporal variability in wind forcing and semidiurnal tides.*

Li 413: typo in the ice speed trend. should be cm/s?

- Thank you for catching this error. Upon further checking, we also noted that the largest ice-speed trend was 3.2cm/s per decade and not 1.6cm/s per decade.

Li 478-485: On the positive side, your inferences can actually be representative of a floe. Your upstream and downstream control volumes are roughly  $(30-40)z_0$  long. For a 10 m MLD, this is roughly 300 m. One keel every 300 m should be typical (as you mention with reference to Wadhams). So effectively, your mixing calculations could be representative of the floe and not as local as you imply here.

- This is a good point and we agree to a large extent. For medium-sized floes with one keel, our analysis should be fairly representative of the dynamics away from the floe

edges. The edges can create regions of flow separation, which can lead to entrained vortices and mixing (see Hester et al. (2021)). For a sufficiently long floe with a keel away from the edges, we anticipate that edge effects would not significantly impact the mixing we observe around the keel. We have added a comment summarizing the above discussion:

- *...and could be representative of the dynamics underneath an entire floe with one keel (ignoring the floe's edges).*

## References

(PFW) Peralta-Ferriz, C., & Woodgate, R. A. (2015). Seasonal and interannual variability of pan-Arctic surface mixed layer properties from 1979 to 2012 from hydrographic data, and the dominance of stratification for multiyear mixed layer depth shoaling. *Progress in Oceanography*, 134, 19–53. <https://doi.org/10.1016/j.pocean.2014.12.005>

Guthrie, J. D., & Morison, J. H. (2021). Not Just Sea Ice: Other Factors Important to Near-inertial Wave Generation in the Arctic Ocean. *Geophysical Research Letters*, 48(3). <https://doi.org/10.1029/2020GL090508>

Lincoln, B. J., Rippeth, T. P., Lenn, Y., Timmermans, M. L., Williams, W. J., & Bacon, S. (2016). Wind-driven mixing at intermediate depths in an ice-free Arctic Ocean. *Geophysical Research Letters*, 43(18), 9749–9756. <https://doi.org/10.1002/2016GL070454>

Dosser, H. v., Chanona, M., Waterman, S., Shibley, N. C., & Timmermans, M. -L. (2021). Changes in Internal Wave-Driven Mixing Across the Arctic Ocean: Finescale Estimates From an 18-Year Pan-Arctic Record. *Geophysical Research Letters*, 48(8). <https://doi.org/10.1029/2020GL091747>

Fine, E. C., & Cole, S. T. (2022). Decadal Observations of Internal Wave Energy, Shear, and Mixing in the Western Arctic Ocean. *Journal of Geophysical Research: Oceans*, 127(5). <https://doi.org/10.1029/2021jc018056>

Sumata, H., de Steur, L., Divine, D. v., Granskog, M. A., & Gerland, S. (2023). Regime shift in Arctic Ocean sea ice thickness. *Nature*, 615(7952), 443–449. <https://doi.org/10.1038/s41586-022-05686-x>

Zhang, F., Pang, X., Lei, R., Zhai, M., Zhao, X., & Cai, Q. (2022). Arctic sea ice motion change and response to atmospheric forcing between 1979 and 2019. *International Journal of Climatology*, 42(3), 1854–1876. <https://doi.org/10.1002/joc.7340>

Meier, W., & Stroeve, J. (2022). An Updated Assessment of the Changing Arctic Sea Ice Cover. *Oceanography*, 35, 10–19. <https://www.jstor.org/stable/27182690>



McPhee, M. G. (1983). Turbulent heat and momentum transfer in the oceanic boundary layer under melting pack ice. *Journal of Geophysical Research: Oceans*, 88(C5), 2827–2835.  
<https://doi.org/10.1029/JC088iC05p02827>

McPhee, M. G., & Kantha, L. H. (1989). Generation of internal waves by sea ice. *Journal of Geophysical Research: Oceans*, 94(C3), 3287–3302.  
<https://doi.org/10.1029/JC094iC03p03287>

McPhee, M. G. (2012). Advances in understanding ice – ocean stress during and since AIDJEX. *Cold Regions Science and Technology*, 76–77, 24–36.  
<https://doi.org/10.1016/j.coldregions.2011.05.001>

Winters, K. B., Lombard, P. N., Riley, J. J., & D’Asaro, E. A. (1995). Available potential energy and mixing in density-stratified fluids. *Journal of Fluid Mechanics*, 289, 115.  
<https://doi.org/10.1017/S002211209500125X>

Hester, E. W., McConnochie, C. D., Cenedese, C., Couston, L.-A., & Vasil, G. (2021). Aspect ratio affects iceberg melting. *Physical Review Fluids*, 6(2), 023802.  
<https://doi.org/10.1103/PhysRevFluids.6.023802>
